# Supplementary material
Source: Springer Nature journal article supplement (https://www.springermedizin.de/resource/supplementary/12885_2014_4717_MOESM1_ESM.pdf/9467054)
Supplement: MOESM1 [file 9467054]

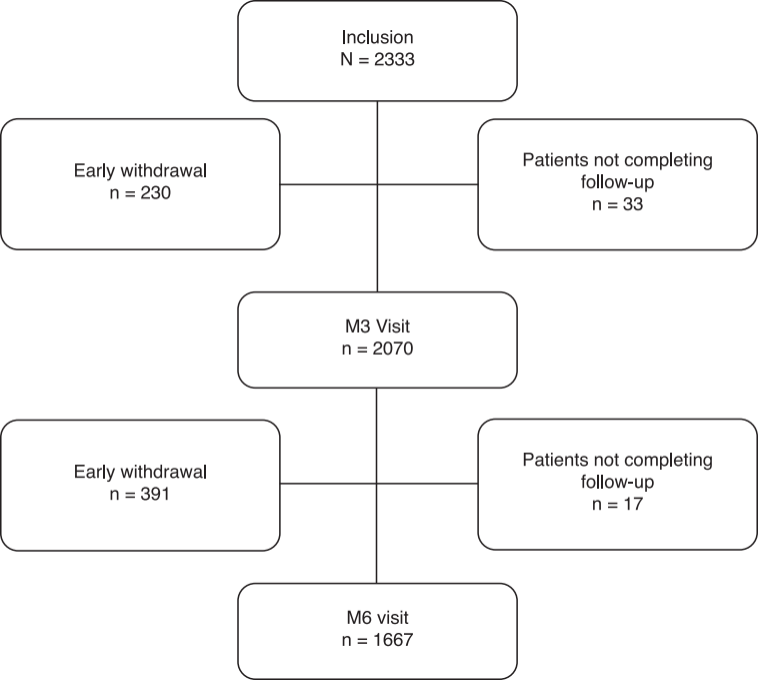

Inclusion  
N = 2333

Early withdrawal  
n = 230

Patients not completing  
follow-up  
n = 33

M3 Visit  
n = 2070

Early withdrawal  
n = 391

Patients not completing  
follow-up  
n = 17

M6 visit  
n = 1667
